# Supplementary material for: Research outcomes of linked prescription drug monitoring program data: a scoping review protocol
Source: HighWire-hosted journal article supplement (doi:10.1136/bmjopen-2021-055290), 2022-04-01
Supplement: bmjopen-2021-055290supp002_data_supplement.pdf [file bmjopen-2021-055290supp002_data_supplement.pdf]

## Grey Literature Search Strategy

### Federal and organizational web sites:

**Centers for Disease Control and Prevention** <https://www.cdc.gov/drugoverdose/pubs/index.html>

Results returned for:

Include any **Opioid OR opioids OR opiate OR opiates OR narcotic OR narcotics** Matching  
**prescription drug monitoring program**  
Language **English**  
Between dates **1/1/2001 - 9/30/2021**

\*\*\*\*\*

**Substance Abuse and Mental Health Services Administration** <https://www.samhsa.gov/>

SAMHSA Publications:

"prescription drug monitoring program"

SAMHSA Data:

"prescription drug monitoring program"  
"prescription drug monitoring"  
"drug monitoring"

SAMHSA.gov

Search "prescription drug monitoring program" from homepage

\*\*\*\*\*

**National Institute on Drug Abuse** <https://www.drugabuse.gov/drug-topics/publications>

Searches:

"prescription drug monitoring program"  
"prescription drug monitoring "  
"drug monitoring"

\*\*\*\*\*

**Prescription Drug Monitoring Program Training and Technical Assistance Center**

<https://www.pdmpassist.org/>

Media: <https://www.pdmpassist.org/Media>

Search: opioids      Format: Publication

\*\*\*\*\*

**PDMP Works** <https://pdmpworks.org/>

\*\*\*\*\*

**NABP PMP Interconnect** <https://nabp.pharmacy/members/pmp-interconnect/>

Publications <https://nabp.pharmacy/resources/publications/>

**Reports****Task Force Reports** <https://nabp.pharmacy/resources/reports/task-force-reports/>**Rogue Rx Activity Reports**<https://nabp.pharmacy/resources/reports/rogue-rx/>**Conference proceedings from meetings of the following professional organizations:**

- American Public Health Association <https://www.apha.org/>
- Society of Behavioral Medicine <https://www.sbm.org/>
- American Society of Addiction Medicine <https://www.asam.org/>
- American Psychiatric Association <https://www.psychiatry.org/>
